# Supplementary material for: Deep learning based gestational age estimation from multi-view fetal brain MRI
Source: Research Square preprint supplement (doi:10.21203/rs.3.rs-7763401/v1), 2025-10-17
Supplement: Supplementary file 1 [file 7158aa79d7ac6ff8fbdfeb95.docx]

**Appendix**

**E1: MRI data** **preprocessing techniques**

MRI was acquired on Philips 1.5T MRI devices and multiple sequences were available. Image evaluation was performed using single-shot fast spin echo (SSH-FSE) T2-weighted. The slice thickness was 4 mm in all samples. Parameters of MRI acquisition as follows: TR/ TE=1300/100ms, layer thickness of 5mm, FOV 375×375mm.

In sagittal images, the slice that best displays the cerebellar vermis was chosen; in coronal images, the slice highlighting the thalamus was selected; and in axial images, the slice that shows the lateral ventricles and septum pellucidum was chosen. The consistency in slices across both manual methods and DL methods allows for a comparison of the results obtained from the two methods.

**E2: Model training details**

Several state-of-the-art (SOTA) DL models, including ResNet101, DenseNet121, VGG16, EfficientNet-B4, ViT-B3, and Swin-T, were employed to develop multi-modal models. To output the gestational prediction results, the sigmoid layer preceding the output layer was changed to a linear activation layer, and the output dimension was altered to 1. Two strategies for DL model training were compared: transfer learning versus non-transfer learning, and single-modal versus multi-modal. In the preliminary research stage, all transfer learning methods were tested and it was found that freezing the trainable layers or a part of the layers resulted in models did not fit as well as when no layers were frozen. Thus, no layers were frozen during transfer learning. The single-modal involved separate training sessions for sagittal, coronal, and axial MRI images. The goal of this approach was to test whether there were variations in outcomes across different modalities. In the following step, multi-modal data were used to comprehensively considered multiplanar features he illustration of the DL models’ training process is depicted in **Fig. 1**.

*L1 Loss* was employed as the regression loss function. Stochastic gradient descent was used as the optimizer (learning rate = 0.001). The Grid-cam was used to create heatmaps for the analysis of areas in fetal brain images that model was focusing on. All models were trained using a batch size of 10 and up to 100 epochs, with training concluding if there was no improvement in the test set loss after 20 epochs. The method was implemented based on the PyTorch DL framework (Pytorch 2.1.0 version) using Python (Python 3.9.13 version), and the GPU utilized for this project was 4 Nvidia 2080Ti RTX.

**E3. Manual method for GA predcition**

In our previous study, the magnetic resonance imaging (MRI) data of the head of 1388 fetuses were collected. The cerebral fronto-occipital diameter (cFOD), cerebral biparietal diameters (cBPD) and cerebellar transverse diameter (TCD) were measured. The measurement method was as follows:

(1) cBPD. In the coronal plane at the level of the temporal horns of the lateral ventricles, the maximum transverse distance of the cerebral substance.

(2) cFOD. In the mid-sagittal plane, the line connecting the frontal horn of the cerebral to the occipital horn.

(3) TCD. In the axial plane at the level of the cerebellar peduncle, the maximum diameter of the cerebellum.

The relationship between those indexes and GA were analyzed. We developed several linear regression models for gestation age prediction. An independent set test was used to validate the models. The results showed that the cFOD, cBPD and TCD had positive and linear correlation with GA.

The regression equation was formulated as:

GA = (TCD × 23.952) + (cFOD × 4.244) + (cBPD × 1.926) + 75.51

The model demonstrated the following predictive performance:

Mean absolute error (MAE): 6.982 days; Coefficient of determination (R²): 0.912; Mean squared error (MSE): 90.67
